# Supplementary figures and images for: An Interpretable Machine-Learning Algorithm to Predict Disordered Protein Phase Separation Based on Biophysical Interactions
Source: MDPI journal article supplement (doi:10.3390/biom12081131), 2022-08-17

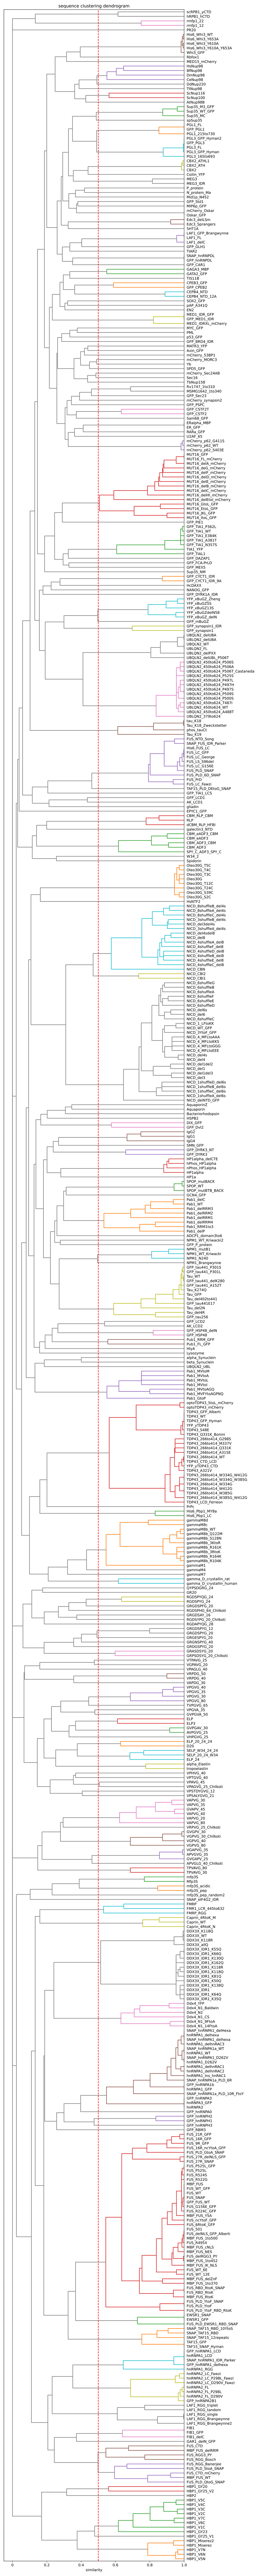

Supplement: s1 [file s1]
